# Supplementary material for: Barriers and Opportunities for WHO ‘Best Buys’ Non-Communicable Disease Policy Adoption and Implementation From a Political Economy Perspective: A Complexity Systematic Review
Source: PubMed Central journal article supplement (PMC11016278; doi:10.34172/ijhpm.2023.7989), 2024-02-04
Supplement: ijhpm-13-7989-s002.pdf [file ijhpm-13-7989-s002.pdf]

**Article title:** Barriers and Opportunities for WHO “Best Buys” Non-communicable Disease Policy Adoption and Implementation From a Political Economy Perspective: A Complexity Systematic Review

**Journal name:** International Journal of Health Policy and Management (IJHPM)

**Authors’ information:** Giulia Loffreda<sup>1\*</sup>, Stella Arakelyan<sup>2,1</sup>, Ibrahim Bou-Orm<sup>1</sup>, Hampus Holmer<sup>3</sup>, Luke N. Allen<sup>4</sup>, Sophie Witter<sup>1</sup>, Alastair Ager<sup>1</sup>, Karin Diaconu<sup>1</sup>

<sup>1</sup>NIHR Research Unit of Health in Fragility, Institute for Global Health and Development, Queen Margaret University Edinburgh, Musselburgh, UK.

<sup>2</sup>Advanced Care Research Centre, Usher Institute, University of Edinburgh, Edinburgh, UK.

<sup>3</sup>Department of Global Public Health, Karolinska Institutet, Stockholm, Sweden.

<sup>4</sup>Department of Clinical Research, London School of Hygiene and Tropical Medicine, London, UK.

**\*Correspondence to:** Giulia Loffreda; Email: [gloffreda@qmu.ac.uk](mailto:gloffreda@qmu.ac.uk)

**Citation:** Loffreda G, Arakelyan S, Bou-Orm I, et al. Barriers and opportunities for WHO “best buys” non-communicable disease policy adoption and implementation from a political economy perspective: a complexity systematic review. *Int J Health Policy Manag.* 2024;13:7989. doi:10.34172/ijhpm.2023.7989

**Supplementary file 2**

Table S1. Inclusion and Exclusion Criteria for full-text screening of articles.

| Inclusion Criteria | Include                                                                                                                                                                                                                                                                                                                                                                                                                                                                                                                                                                                                                                                                                                                                                                                                                          | Exclude                                                                                                    |
|--------------------|----------------------------------------------------------------------------------------------------------------------------------------------------------------------------------------------------------------------------------------------------------------------------------------------------------------------------------------------------------------------------------------------------------------------------------------------------------------------------------------------------------------------------------------------------------------------------------------------------------------------------------------------------------------------------------------------------------------------------------------------------------------------------------------------------------------------------------|------------------------------------------------------------------------------------------------------------|
| Population         | Any population where NCD policy was developed at national, regional, and international level                                                                                                                                                                                                                                                                                                                                                                                                                                                                                                                                                                                                                                                                                                                                     |                                                                                                            |
| Intervention       | <p>NCDs-related defined as:</p> <ul style="list-style-type: none"> <li>• Consider, the multi or individual factorial drivers of one or multiple NCD/s, and related public health or the social determinants of health; or</li> <li>• Involve a policy or intervention in line with the 16 WHO Best buys, these may involve: <ul style="list-style-type: none"> <li>• transformative coordinated action (including policies, strategies, practices) across a broad range of disciplines and stakeholders, including partners outside traditional health sectors;</li> <li>• Operate across all levels of governance, including the local level so that such approaches are reinforced and sustained, and</li> <li>• Identify and target opportunities throughout the life course (from infancy to old age)</li> </ul> </li> </ul> | Studies which looked at only one portion of the population or individual level approach, behavioral change |

|              |                                                                                                                                                                                                                                                                                                                                                                                                                                                                                                                                                                                                                                                                                                                                                                                                                                                                                                                                                                                                                                                                                                                                                                                  |                                                                                                                             |
|--------------|----------------------------------------------------------------------------------------------------------------------------------------------------------------------------------------------------------------------------------------------------------------------------------------------------------------------------------------------------------------------------------------------------------------------------------------------------------------------------------------------------------------------------------------------------------------------------------------------------------------------------------------------------------------------------------------------------------------------------------------------------------------------------------------------------------------------------------------------------------------------------------------------------------------------------------------------------------------------------------------------------------------------------------------------------------------------------------------------------------------------------------------------------------------------------------|-----------------------------------------------------------------------------------------------------------------------------|
| Outcome      | <p>Outcomes are defined as:</p> <p>Barriers and/or facilitators to adoption and implementation from a political economy perspective and may include (but not limited to):</p> <p>Organizational outcomes e.g., cross-sector collaboration; new partnerships; environmental changes; resource allocation; leadership etc.</p> <p>Process outcomes, e.g., what each project aimed to achieve and barriers and facilitating factors associated with achieving or not achieving</p> <p>Central level: funding, legal frameworks for implementation, etc. (or lack thereof)</p> <p>Decentralized level: management/support skills, access to frontlines, enforcement power, communication/information/understanding (or lack thereof), competing priorities/values/ideas/interests, etc.</p> <p>Frontline level: staffing, skills, infrastructure/materials, communication/information/understanding of the policy, competing priorities/values/ideas/interests,</p> <p>Communities/demand side: information/understanding, cultural barriers, financial barriers, access/geographical barriers, etc.</p> <p>Outcomes may be at population level, national/regional/global level.</p> | <p>Cost effectiveness; not reporting outcomes under study.</p>                                                              |
| Study design | <p>Primary/empirical research. These may be randomized controlled trials (RCTs) or non-RCTs, natural experiments, mixed methods studies, policy analysis, key informant interviews; policy documents on NCD prevention (including acts and laws, strategic plans, guidelines and government directives), case studies in successful policy formulation and implementation at national/international level.</p>                                                                                                                                                                                                                                                                                                                                                                                                                                                                                                                                                                                                                                                                                                                                                                   | <p>Case-control studies; clinical studies; behavioral; etiological; systematic and scoping reviews; literature reviews.</p> |
