# Supplementary material for: Barriers and Opportunities for WHO ‘Best Buys’ Non-Communicable Disease Policy Adoption and Implementation From a Political Economy Perspective: A Complexity Systematic Review
Source: PubMed Central journal article supplement (PMC11016278; doi:10.34172/ijhpm.2023.7989), 2024-02-04
Supplement: ijhpm-13-7989-s003.pdf [file ijhpm-13-7989-s003.pdf]

**Article title:** Barriers and Opportunities for WHO “Best Buys” Non-communicable Disease Policy Adoption and Implementation From a Political Economy Perspective: A Complexity Systematic Review

**Journal name:** International Journal of Health Policy and Management (IJHPM)

**Authors’ information:** Giulia Loffreda<sup>1\*</sup>, Stella Arakelyan<sup>2,1</sup>, Ibrahim Bou-Orm<sup>1</sup>, Hampus Holmer<sup>3</sup>, Luke N. Allen<sup>4</sup>, Sophie Witter<sup>1</sup>, Alastair Ager<sup>1</sup>, Karin Diaconu<sup>1</sup>

<sup>1</sup>NIHR Research Unit of Health in Fragility, Institute for Global Health and Development, Queen Margaret University Edinburgh, Musselburgh, UK.

<sup>2</sup>Advanced Care Research Centre, Usher Institute, University of Edinburgh, Edinburgh, UK. <sup>3</sup>Department of Global Public Health, Karolinska Institutet, Stockholm, Sweden.

<sup>4</sup>Department of Clinical Research, London School of Hygiene and Tropical Medicine, London, UK.

**\*Correspondence to:** Giulia Loffreda; Email: [gloffreda@gmu.ac.uk](mailto:gloffreda@gmu.ac.uk)

**Citation:** Loffreda G, Arakelyan S, Bou-Orm I, et al. Barriers and opportunities for WHO “best buys” non-communicable disease policy adoption and implementation from a political economy perspective: a complexity systematic review. *Int J Health Policy Manag.* 2024;13:7989. doi:10.34172/ijhpm.2023.7989

**Supplementary file 3**

**Table S2. Characteristics of studies**

| No. | Policy area | Reference                                                                                                                                                                                                                                                                                                                                                            | Country of study | Context classification  | Method               |
|-----|-------------|----------------------------------------------------------------------------------------------------------------------------------------------------------------------------------------------------------------------------------------------------------------------------------------------------------------------------------------------------------------------|------------------|-------------------------|----------------------|
| 1   | Alcohol     | Abiona, O., Oluwasanu, M. & Oladepo, O. Analysis of alcohol policy in Nigeria: multi-sectoral action and the integration of the WHO “best-buy” interventions. <i>BMC Public Health</i> <b>19</b> , 810 (2019). <a href="https://doi.org/10.1186/s12889-019-7139-9">https://doi.org/10.1186/s12889-019-7139-9</a>                                                     | Nigeria          | Fragile                 | Mixed method         |
| 2   | Alcohol     | Colin Angus, John Holmes, and Petra S Meier. 2019. “Comparing Alcohol Taxation Throughout the European Union.” <i>Addiction</i> 114: 1489–1494. <a href="https://doi.org/10.1111/add.14631">https://doi.org/10.1111/add.14631</a> .                                                                                                                                  | 28 EU Member     | Non-fragile (HIC + MIC) | Descriptive analysis |
| 3   | Alcohol     | David A. Keatley, Sarah J. Hardcastle, Natacha Carragher, Tanya N. Chikritzhs, Mike Daube, Adam Lonsdale, and Martin S. Hagger. 2018. “Attitudes and Beliefs Towards Alcohol Minimum Pricing in Western Australia.” <i>Health Promotion International</i> 33 (3): 400–409. <a href="https://doi.org/10.1093/heapro/daw092">https://doi.org/10.1093/heapro/daw092</a> | Australia        | Non-fragile (HIC)       | Policy analysis      |

|    |                                           |                                                                                                                                                                                                                                                                                                                                                                                                                      |                                          |                              |                    |
|----|-------------------------------------------|----------------------------------------------------------------------------------------------------------------------------------------------------------------------------------------------------------------------------------------------------------------------------------------------------------------------------------------------------------------------------------------------------------------------|------------------------------------------|------------------------------|--------------------|
| 4  | Alcohol                                   | Mary Lawhon and Clare Herrick. 2013. "Alcohol Control in the News: The Politics of Media Representations of Alcohol Policy in South Africa." <i>Journal of Health Politics, Policy, and Law</i> 38 (5): 987–1021. doi: 10.1215/03616878-2334683. Epub 2013 Jun 21. PMID: 23794743.                                                                                                                                   | South Africa                             | Non-fragile (UMIC)           | Document analysis  |
| 5  | Alcohol                                   | Jessica Li, Melanie Lovatt, Douglas Eadie, Fiona Dobbie, Petra Meier, John Holmes, Gerard Hastings, and Anne Marie MacKintosh. 2017. "Public Attitudes Towards Alcohol Control Policies in Scotland and England: Results from a Mixed-Methods Study." <i>Social Science and Medicine</i> 177: 177–189. <a href="https://doi.org/10.1016/j.socscimed.2017.01.037">https://doi.org/10.1016/j.socscimed.2017.01.037</a> | UK                                       | Non-fragile (HIC)            | Mixed method       |
| 6  | Alcohol                                   | Rupali J. Limaye, Lainie Rutkow, Rajiv N. Rimal, and David H Jernigan. 2014. "Informal Alcohol in Malawi: Stakeholder Perceptions and Policy Recommendations." <i>Journal of Public Health Policy</i> 35: 119–131. <a href="https://doi.org/10.1057/jphp.2013.43">https://doi.org/10.1057/jphp.2013.43</a>                                                                                                           | Malawi                                   | Non-fragile (LIC)            | Qualitative method |
| 7  | Alcohol                                   | Beatrice L. Matanje Mwangomba, Misheck J. Nkhata, Alex Baldacchino, Jennifer Wisdom, and Bagrey Ngwira. 2018. "Alcohol Policies in Malawi: Inclusion of WHO "Best Buy" Interventions and Use of Multi-Sectoral Action." <i>BMC Public Health</i> 18: 957. <a href="https://doi.org/10.1186/s12889-018-5833-7">https://doi.org/10.1186/s12889-018-5833-7</a>                                                          | Malawi                                   | Non-fragile (LIC)            | Case study         |
| 8  | Alcohol                                   | Eva Jané-Llopis, Daša Kokole, Maria Neufeld, Omer Syed Muhammad Hasan, and Jürgen Rehm. 2020. "What Is the Current Alcohol Labelling Practice in the WHO European Region and What Are Barriers and Facilitators to Development and Implementation of Alcohol Labelling Policy?" Health Evidence Network Synthesis Report No. 68. Copenhagen: WHO Regional Office for Europe.                                         | Europe                                   | Non fragile (HIC)            | Case study         |
| 9  | Alcohol                                   | Kidong Park. 2019. "New Law on Prevention and Control of Alcohol Related Harms in Vietnam." <i>Journal of Global Health Science</i> 1 (2): e49. <a href="https://doi.org/10.35500/jghs.2019.1.e49">https://doi.org/10.35500/jghs.2019.1.e49</a>                                                                                                                                                                      | Vietnam                                  | Non-fragile (LMIC)           | Qualitative method |
| 10 | Alcohol                                   | Dag Rekve, Nicholas Banatvala, Adam Karpati, Dudley Tarlton, Lucinda Westerman, Kristina Sperkova, Sally Casswel, Maik Duennbie, Ariella Rojhani, Øystein Bakke, Maristela Monteiro, Natalia Linou, Alexey Kulikov, and Vladimir B Poznyak. 2019. "Prioritising Action on Alcohol for Health and Development." <i>BMJ</i> 367: l6162. doi:10.1136/bmj.l6162                                                          | Global                                   | Global                       | Policy analysis    |
| 11 | Alcohol                                   | Karen Wallace and Bayard Roberts. 2014. "An Exploration of the Alcohol Policy Environment in Post-Conflict Countries." <i>Alcohol and Alcoholism</i> 49 (3): 356–362. <a href="https://doi.org/10.1093/alcalc/agt142">https://doi.org/10.1093/alcalc/agt142</a>                                                                                                                                                      | conflict affected states                 | Fragile                      | Case study         |
| 12 | Alcohol, diet, tobacco, physical activity | Vivian Lin and Bronwyn Carter. 2013. "From Healthy Public Policy to Intersectoral Action and Health-in-All Policies." In <i>Global Handbook on Noncommunicable Diseases and Health Promotion</i> , edited by D. McQueen, 189–201. New York: Springer. <a href="https://doi.org/10.1007/978-1-4614-7594-1_12">https://doi.org/10.1007/978-1-4614-7594-1_12</a>                                                        | Global case studies                      | Global                       | Mixed method       |
| 13 | Cancer                                    | Ranjit Mandal and Partha Basu. 2018. "Cancer Screening and Early Diagnosis in Low and Middle Income Countries." <i>Bundesgesundheitsbl</i> 61: 1505–1512. <a href="https://doi.org/10.1007/s00103-018-2833-9">https://doi.org/10.1007/s00103-018-2833-9</a>                                                                                                                                                          | LMICs                                    | Global                       | Document analysis  |
| 14 | Cancer                                    | Malcolm A. Moore. 2014. "Cancer Control Programs in East Asia: Evidence from the International Literature." <i>Journal of Preventative Medicine and Public Health</i> 47 (4). <a href="https://doi.org/10.3961/jpmph.2014.47.4.183">https://doi.org/10.3961/jpmph.2014.47.4.183</a>                                                                                                                                  | East Asia                                | Non fragile (HIC+MIC)        | Case study         |
| 15 | Cancer                                    | Justin O. Parkhurst and Madhulika Vulimiri. 2013. "Cervical Cancer and the Global Health Agenda: Insights from Multiple Policy-Analysis Frameworks." <i>Global Public Health</i> 8 (10): 1093–1108. doi: 10.1080/17441692.2013.850524                                                                                                                                                                                | Global                                   | Global                       | Policy analysis    |
| 16 | Cancer                                    | Diana Sarfati, Rachel Dyer, Filipina Amosa-Lei Sam, et al. 2019. "Cancer Control in the Pacific: Big Challenges Facing Small Island States." <i>Lancet Oncology</i> 20 (9): e475–e492.                                                                                                                                                                                                                               | Pacific island countries and territories | Fragile (MIC) [not for OECD] | Case study         |
| 17 | Cancer                                    | Dingle Spence, Rachel Dyer, Glennis Andall-Brereton, et al 2019. "Cancer Control in the Caribbean Island Countries and Territories: Some Progress but the Journey Continues." <i>Lancet Oncology</i> 20 (9): e503–e521.                                                                                                                                                                                              | Caribbean Island countries               | Non-fragile (MIC)            | Case study         |
| 18 | Cancer                                    | Silvina Frech, Catherine A. Muha, Lisa M. Stevens, et al 2018. "Perspectives on Strengthening Cancer Research and Control in Latin America Through Partnerships and Diplomacy: Experience of the National Cancer Institute's Center for Global Health." <i>Journal of Global Oncology</i> 4: 1-11. doi:10.1200/JGO.17.00149                                                                                          | Latin America                            | Non fragile (MIC)            | Case study         |

|    |          |                                                                                                                                                                                                                                                                                                                                                                                                                                                                                              |                                   |                         |                                |
|----|----------|----------------------------------------------------------------------------------------------------------------------------------------------------------------------------------------------------------------------------------------------------------------------------------------------------------------------------------------------------------------------------------------------------------------------------------------------------------------------------------------------|-----------------------------------|-------------------------|--------------------------------|
| 19 | Diabetes | Willemijn E. De Bruin, Cherie Stayner, Michel de Lange, and Rachael W. Taylor. 2018. "Who Are the Key Players Involved with Shaping Public Opinion and Policies on Obesity and Diabetes in New Zealand?" <i>Nutrients</i> 10 (11): 1592. <a href="https://doi.org/10.3390/nu10111592">https://doi.org/10.3390/nu10111592</a>                                                                                                                                                                 | New Zealand                       | Non-fragile (HIC)       | Social Network analysis        |
| 20 | Diabetes | Tint Swe Latt, Than Than Aye, Ko Ko, and Ko Ko Zaw. 2016. "Gaps and Challenges to Integrating Diabetes Care in Myanmar." <i>WHO South-East Asia Journal of Public Health</i> 5 (1): 48–52. <a href="https://doi.org/10.4103/2224-3151.206553">https://doi.org/10.4103/2224-3151.206553</a>                                                                                                                                                                                                   | Myanmar                           | Fragile (LMIC)          | Document analysis              |
| 21 | Diabetes | Linda Penn, Angela Rodrigues, Anna Haste, Marta M Marques, Kirsten Budig, Kirby Sainsbury, Ruth Bell, Vera Araújo-Soares, Martin White, Carolyn Summerbell, Elizabeth Goyder, Alan Brennan, Ashley J Adamson, and Falko F Sniehotta. 2018. "NHS Diabetes Prevention Programme in England: Formative Evaluation of the Programme in Early Phase Implementation." <i>BMJ Open</i> 8: e019467. doi: 10.1136/bmjopen-2017-019467                                                                 | England                           | Non-fragile (HIC)       | Mixed method                   |
| 22 | Diabetes | André M. N. Renzaho. 2015. "The Post-2015 Development Agenda for Diabetes in Sub-Saharan Africa: Challenges and Future Directions." <i>Global Health Action</i> 8: 27600. <a href="https://doi.org/10.3402/gha.v8.27600">https://doi.org/10.3402/gha.v8.27600</a>                                                                                                                                                                                                                            | Sub-Saharan Africa                | Non-fragile (UMIC)      | Case study                     |
| 23 | Diabetes | Veronica Shiroya, Florian Neuhann, Olaf Müller, and Andreas Deckert. 2019. "Challenges in Policy Reforms for Non-Communicable Diseases: The Case of Diabetes in Kenya." <i>Global Health Action</i> 12: 1. doi: 10.1080/16549716.2019.1611243                                                                                                                                                                                                                                                | Kenya                             | Fragile (LMIC)          | Document analysis + interviews |
| 24 | Diet     | Joao Breda, Lea Samant, Nash Castro, Stephen Whiting, Julianne Williams, Jo Jewell, Kaia Engesveen, and Kremlin Wickramasinghe. 2020. "Towards Better Nutrition in Europe: Evaluating Progress and Defining Future Directions." <i>Food Policy</i> 96: 101887. <a href="https://doi.org/10.1016/j.foodpol.2020.101887">https://doi.org/10.1016/j.foodpol.2020.101887</a>                                                                                                                     | WHO European Region               | Non-fragile (HIC + MIC) | Survey                         |
| 25 | Diet     | Tracy Comans, Nicole Moretto, and Joshua Byrnes. 2017. "Public Preferences for the Use of Taxation and Labelling Policy Measures to Combat Obesity in Young Children in Australia." <i>International Journal of Environmental Research and Public Health</i> 14 (3): 324. <a href="https://doi.org/10.3390/ijerph14030324">https://doi.org/10.3390/ijerph14030324</a>                                                                                                                        | Australia                         | Non-fragile (HIC)       | Survey                         |
| 26 | Diet     | A. Gesser-Edelsburg, R. Endevelt, and Y. Tirosch-Kamienchick. 2014. Nutrition Labelling and the Choices Logo in Israel: Positions and Perceptions of Leading Health Policy Makers. <i>Journal of Human Nutrition and Dietetics: The Official Journal of the British Dietetic Association</i> 27 (1): 58–68. <a href="https://doi.org/10.1111/jhn.12050">https://doi.org/10.1111/jhn.12050</a>                                                                                                | Israel                            | Non-fragile (HIC)       | Qualitative method             |
| 27 | Diet     | Melissa Mialon, Jonathan Mialon, Giovanna Calixto Andrade, and Moubarac Jean-Claude. 2020. "'We Must Have a Sufficient Level of Profitability': Food Industry Submissions to the French Parliamentary Inquiry on Industrial Food." <i>Critical Public Health</i> 30 (4): 457–467. doi: 10.1080/09581596.2019.1606418                                                                                                                                                                         | France                            | Non-fragile (HIC)       | Document analysis              |
| 28 | Diet     | Melissa Mialon, Boyd Swinburn, Steven Allender, and Gary Sacks. 2016. "Systematic Examination of Publicly-Available Information Reveals the Diverse and Extensive Corporate Political Activity of the Food Industry in Australia." <i>BMC Public Health</i> 16: 283. <a href="https://doi.org/10.1186/s12889-016-2955-7">https://doi.org/10.1186/s12889-016-2955-7</a>                                                                                                                       | Australia, UK                     | Non-fragile (HIC)       | Case study                     |
| 29 | Diet     | Melissa Mialon, Boyd Swinburn, Jillian Wate, Isimeli Tukana, and Gary Sacks. 2016. "Analysis of the Corporate Political Activity of Major Food Industry Actors in Fiji." <i>Global Health</i> 12: 18. <a href="https://doi.org/10.1186/s12992-016-0158-8">https://doi.org/10.1186/s12992-016-0158-8</a>                                                                                                                                                                                      | Fiji                              | Non-fragile (UMIC)      | Mixed method                   |
| 30 | Diet     | R. Pérez-Escamilla, C.K. Lutter, C. Rabadan-Diehl, A. Rubinstein, A. Calvillo, C. Corvalán, C. Batis, E. Jacoby, S. Vorkoper, L. Kline, E. Ewart-Pierce, and J.A. Rivera. 2017. "Prevention of Childhood Obesity and Food Policies in Latin America: From Research to Practice." <i>Obesity Reviews : An Official Journal of the International Association for the Study of Obesity</i> 18 Suppl 2: 28–38. <a href="https://doi.org/10.1111/obr.12574">https://doi.org/10.1111/obr.12574</a> | Mexico, Chile, Ecuador, Argentina | Non-fragile (UMIC)      | Case study                     |
| 31 | Diet     | Taryn Phillips, Amerita Ravuvu, Celia McMichael, Anne Marie Thow, Jennifer Browne, Gade Waqa, Jillian Tutuo, and Deborah Gleeson. 2021. "Nutrition Policy-Making in Fiji: Working in and Around Neoliberalisation in the Global South." <i>Critical Public Health</i> 31 (3): 316–326. doi: 10.1080/09581596.2019.1680805                                                                                                                                                                    | Fiji                              | Non-fragile (UMIC)      | Mixed method                   |
| 32 | Diet     | Jennifer L Pomeranz, Leslie Zellers, Michael Bare, and Mark Pertschuk. 2019. "State Preemption of Food and Nutrition Policies and Litigation: Undermining Government's Role in Public Health." <i>American Journal of Preventive Medicine</i> 56 (1): 47–57.                                                                                                                                                                                                                                 | USA                               | Non-fragile (HIC)       | Policy analysis                |

|    |      |                                                                                                                                                                                                                                                                                                                                                                                                                                                                                                                  |                                                                  |                    |                           |
|----|------|------------------------------------------------------------------------------------------------------------------------------------------------------------------------------------------------------------------------------------------------------------------------------------------------------------------------------------------------------------------------------------------------------------------------------------------------------------------------------------------------------------------|------------------------------------------------------------------|--------------------|---------------------------|
| 33 | Diet | Erica Reeve, Anne Marie Thow, Colin Bell, Katrin Engelhardt, Ella Cecilia Gamolo-Naliponguit, John Juliard Go, and Gary Sacks. 2018. "Implementation Lessons for School Food Policies and Marketing Restrictions in the Philippines: A Qualitative Policy Analysis." <i>Global Health</i> 14: 8. <a href="https://doi.org/10.1186/s12992-017-0320-y">https://doi.org/10.1186/s12992-017-0320-y</a>                                                                                                               | Philippines                                                      | Non-fragile (UMIC) | Qualitative method        |
| 34 | Diet | C. Scott, B. Hawkins, and C. Knai. 2017. "Food and Beverage Product Reformulation as a Corporate Political Strategy." <i>Social Science and Medicine</i> 172: 37–45. <a href="https://doi.org/10.1016/j.socscimed.2016.11.020">https://doi.org/10.1016/j.socscimed.2016.11.020</a>                                                                                                                                                                                                                               | USA                                                              | Non fragile (HIC)  | Policy analysis           |
| 35 | Diet | B. Winburn. 2013. "Monitoring and Benchmarking Government Policies and Actions to Improve the Healthiness of Food Environments: A Proposed Government Healthy Food Environment Policy Index." <i>Obesity Reviews: An Official Journal of the International Association for the Study of Obesity</i> 14 Suppl 1: 24–37. <a href="https://doi.org/10.1111/obr.12073">https://doi.org/10.1111/obr.12073</a>                                                                                                         | Global                                                           | Global             | Mixed method              |
| 36 | Diet | Anne Marie Thow, Alexandra Jones, Corinna Hawkes, Iqra Ali, and Ronald Labonté. 2018. "Nutrition Labelling Is a Trade Policy Issue: Lessons from an Analysis of Specific Trade Concerns at the World Trade Organization." <i>Health Promotion International</i> 33 (4): 561–571. <a href="https://doi.org/10.1093/heapro/daw109">https://doi.org/10.1093/heapro/daw109</a>                                                                                                                                       | Chile, Indonesia, Peru, Ecuador, Thailand                        | Non-fragile (MIC)  | Document analysis         |
| 37 | Diet | Anne Marie Thow Alexandra Jones, Carmen Huckel Schneider, and Ronald Labonté. 2019. "Global Governance of Front-of-Pack Nutrition Labelling: A Qualitative Analysis." <i>Nutrients</i> 11 (2): 268. <a href="https://doi.org/10.3390/nu11020268">https://doi.org/10.3390/nu11020268</a>                                                                                                                                                                                                                          | global                                                           | Global             | Qualitative method        |
| 38 | Diet | Gade Waqa, Marj Moodie, Wendy Snowdon, Catherine Latu, Jeremaia Coriakula, Steven Allender, and Colin Bell. 2017. "Exploring the Dynamics of Food-Related Policymaking Processes and Evidence Use in Fiji Using Systems Thinking." <i>Health Research and Policy Systems</i> 15: 74. <a href="https://doi.org/10.1186/s12961-017-0240-6">https://doi.org/10.1186/s12961-017-0240-6</a>                                                                                                                           | Fiji                                                             | Non-fragile (UMIC) | Qualitative method        |
| 39 | Diet | Adrián Alberto Díaz, Paula Mariana Veliz, Gabriela Rivas-Mariño, Carina Vance Mafla, Luz María Martínez Altamirano, Cecilia Vaca Jones. 2017. "Etiquetado de Alimentos en Ecuador: Implementación, Resultados y Acciones Pendientes." <i>Revista Panamericana de Salud Pública</i> 41: e54.                                                                                                                                                                                                                      | Ecuador                                                          | Non-fragile (MIC)  | Case study                |
| 40 | Diet | Lainie Rutkow, Jesse Jones-Smith, Hannah J. Walters, Marguerite O'Hara, and Sara N. Bleich. 2016. "Factors That Encourage and Discourage Policy-Making to Prevent Childhood Obesity: Experience in the United States." <i>Journal of Public Health Policy</i> 37: 514–527. <a href="https://doi.org/10.1057/s41271-016-0035-y">https://doi.org/10.1057/s41271-016-0035-y</a>                                                                                                                                     | USA                                                              | Non-fragile (HIC)  | Primary qualitative: KIIs |
| 41 | Diet | Sirinya Phulkerd, Stefanie Vandevijvere, Mark Lawrence, Viroj Tangcharoensathien, and Gary Sacks. 2017. "Level of Implementation of Best Practice Policies for Creating Healthy Food Environments: Assessment by State and Non-State Actors in Thailand." <i>Public Health Nutrition</i> 20 (3): 381–390. doi:10.1017/S1368980016002391                                                                                                                                                                          | Thailand                                                         | Non fragile (MIC)  | Mixed method              |
| 42 | Diet | Donley Studlar and Paul Cairney. 2019. "Multilevel Governance, Public Health and the Regulation of Food: Is Tobacco Control Policy a Model?" <i>Journal of Public Health Policy</i> 40: 147–165. <a href="https://doi.org/10.1057/s41271-019-00165-6">https://doi.org/10.1057/s41271-019-00165-6</a>                                                                                                                                                                                                             | UK, USA                                                          | Non-fragile (HIC)  | Document analysis         |
| 43 | Diet | Anne Marie Thow, Wendy Snowdon, Ronald Labonté, Deborah Gleeson, David Stuckler, Libby Hattersley, Ashley Schram, Adrian Kay, and Sharon Frielf. 2015. "Will the Next Generation of Preferential Trade and Investment Agreements Undermine Prevention of Noncommunicable Diseases? A Prospective Policy Analysis of the Trans Pacific Partnership Agreement." <i>Health Policy</i> 119 (1): 88–96. <a href="https://doi.org/10.1016/j.healthpol.2014.08.002">https://doi.org/10.1016/j.healthpol.2014.08.002</a> | countries involved in trans-Pacific Partnership Agreement (TPPA) | Global             | Policy analysis           |
| 44 | Diet | Barbara Von Tigerstrom. 2013. "How Do International Trade Obligations Affect Policy Options for Obesity Prevention? Lessons from Recent Developments in Trade and Tobacco Control." <i>Canadian Journal of Diabetes</i> 37 (3): 182–188                                                                                                                                                                                                                                                                          | WTO                                                              | Global             | Document analysis         |
| 45 | Diet | Boyd Swinburn, Vivica Kraak, Harry Rutter, Stefanie Vandevijvere, Tim Lobstein, Gary Sacks, Fabio Gomes, Tim Marsh, and Roger Magnusson. 2015. "Strengthening of Accountability Systems to Create Healthy Food Environments and Reduce Global Obesity." <i>Lancet</i> 385 9986.: 2534–2545.                                                                                                                                                                                                                      | Global                                                           | Global             | Case study                |

|    |                        |                                                                                                                                                                                                                                                                                                                                                                                                                                                                                                                                                                          |                                                        |                         |                       |
|----|------------------------|--------------------------------------------------------------------------------------------------------------------------------------------------------------------------------------------------------------------------------------------------------------------------------------------------------------------------------------------------------------------------------------------------------------------------------------------------------------------------------------------------------------------------------------------------------------------------|--------------------------------------------------------|-------------------------|-----------------------|
| 46 | Diet                   | Dariush Mozaffarian, Sonia Y. Angell, Tim Lang, and Juan A. Rivera. 2018. "Role of Government Policy in Nutrition—Barriers to and Opportunities for Healthier Eating." <i>BMJ</i> 361: k2426. doi:10.1136/bmj.k2426                                                                                                                                                                                                                                                                                                                                                      | global                                                 | Global                  | Policy analysis       |
| 47 | Diet                   | Anne Marie Thow, David Sanders, Eliza Drury, Thandi Puoane, Syeda N. Chowdhury, Lungiswa Tsolekile, and Joel Negin. 2015. "Regional Trade and the Nutrition Transition: Opportunities to Strengthen NCD Prevention Policy in the Southern African Development Community." <i>Global Health Action</i> 8: 1. doi: 10.3402/gha.v8.28338                                                                                                                                                                                                                                    | 15 countries in Southern African Development Community | Non-fragile (LMIC)      | Policy analysis       |
| 48 | Diet, tobacco          | R. S. Magnusson. 2015. "Case Studies in Nanny State Name-Calling: What Can We Learn?" <i>Public Health</i> 129 (8): 1074–1082. <a href="https://doi.org/10.1016/j.puhe.2015.04.023">https://doi.org/10.1016/j.puhe.2015.04.023</a>                                                                                                                                                                                                                                                                                                                                       | Global                                                 | Global                  | Case study            |
| 49 | Fat                    | Uriyoán Colón-Ramos, Rafael Monge-Rojas, and Hannia Campos. 2014. "Impact of WHO Recommendations to Eliminate Industrial Trans-Fatty Acids from the food supply in Latin America and the Caribbean." <i>Health Policy and Planning</i> 29 (5): 529–541. <a href="https://doi.org/10.1093/heapol/czt034">https://doi.org/10.1093/heapol/czt034</a>                                                                                                                                                                                                                        | 13 countries in Latin America and the Caribbean        | Non-fragile (MIC)       | Mixed method          |
| 50 | Fat                    | Shauna M. Downs, Anne Marie Thow, Suparna Ghosh-Jerath, and Stephen R. Leeder. 2015. "Aligning Food-Processing Policies to Promote Healthier Fat Consumption in India." <i>Health Promotion International</i> 30 (3): 595–605. <a href="https://doi.org/10.1093/heapro/dat094">https://doi.org/10.1093/heapro/dat094</a>                                                                                                                                                                                                                                                 | India                                                  | Non-fragile (MIC)       | Mixed method          |
| 51 | Fat                    | World Health Organization. 2019. <i>Countdown to 2023: WHO Report on Global Trans-Fat Elimination 2019</i> . Washington, DC: World Health Organization. <a href="https://apps.who.int/iris/handle/10665/331300">https://apps.who.int/iris/handle/10665/331300</a> .                                                                                                                                                                                                                                                                                                      | Global                                                 | Global                  | Case study            |
| 52 | Hypertension, diabetes | Meena Daivadanam, Maia Ingram, Kristi Sidney Annerstedt, et al, on behalf of the GACD Concepts and Contexts working group. 2019. "The Role of Context in Implementation Research for Non-Communicable Diseases: Answering the 'How-To' Dilemma." <i>PLoS ONE</i> 14 (4): e0214454. <a href="https://doi.org/10.1371/journal.pone.0214454">https://doi.org/10.1371/journal.pone.0214454</a>                                                                                                                                                                               | Global                                                 | Global                  | Survey                |
| 53 | Hypertension, diet     | Amos K. Laar, Alma J. Adler, Agnes M. Kotoh, Helena Legido-Quigley, Isabelle L. Lange, Pablo Perel, and Peter Lamptey. 2019. "Health System Challenges to Hypertension and Related Non-Communicable Diseases Prevention and Treatment: Perspectives from Ghanaian Stakeholders." <i>BMC Health Services Research</i> 19: 693. <a href="https://doi.org/10.1186/s12913-019-4571-6">https://doi.org/10.1186/s12913-019-4571-6</a>                                                                                                                                          | Ghana                                                  | Non-fragile (LMIC)      | Qualitative method    |
| 54 | Hypertension, diet     | Roger Magnusson and Belinda Reeve. 2015. "Food Reformulation, Responsive Regulation, and "Regulatory Scaffolding": Strengthening Performance of Salt Reduction Programs in Australia and the United Kingdom." <i>Nutrients</i> 7 (7): 5281–5308. <a href="https://doi.org/10.3390/nu7075221">https://doi.org/10.3390/nu7075221</a>                                                                                                                                                                                                                                       | Australia, UK                                          | Non-fragile (HIC)       | Document analysis     |
| 55 | NCD                    | Salim M. Adib. 2014. <i>Non Communicable Disease Prevention and Control Plan (NCD-PCP) for Lebanon</i> . WHO Lebanon Office. <a href="https://extranet.who.int/ncdccs/Data/LBN_B3_Final%20plan%202014.pdf">https://extranet.who.int/ncdccs/Data/LBN_B3_Final%20plan%202014.pdf</a>                                                                                                                                                                                                                                                                                       | Lebanon                                                | Non-fragile (MIC)       | Case study            |
| 56 | NCD                    | Luke N. Allen, Brian D. Nicholson, Beatrice Y.T. Yeung, and Francisco Goiana-da-Silva. 2020. "Implementation of Non-Communicable Disease Policies: A Geopolitical Analysis of 151 Countries." <i>Lancet Global Health</i> 8 (1): e50–e58.                                                                                                                                                                                                                                                                                                                                | Analysis of 151 countries                              | Global                  | Geopolitical analysis |
| 57 | NCD                    | Pepita Barlow, Ronald Labonte, Martin McKee, and David Stuckler. 2018. "Trade Challenges at the World Trade Organization to National Noncommunicable Disease Prevention Policies: A Thematic Document Analysis of Trade and Health Policy Space." <i>PLoS Medicine</i> 15 (6): e1002590. <a href="https://doi.org/10.1371/journal.pmed.1002590">https://doi.org/10.1371/journal.pmed.1002590</a>                                                                                                                                                                         | 122 WTO member states                                  | Global                  | Document analysis     |
| 58 | NCD                    | Tuhin Biswas, Sonia Pervin, Md. Imtiaz Alam Tanim, Louis Niessen, and Anwar Islam. 2017. "Bangladesh Policy on Prevention and Control of Non-Communicable Diseases: A Policy Analysis." <i>BMC Public Health</i> 17: 582. <a href="https://doi.org/10.1186/s12889-017-4494-2">https://doi.org/10.1186/s12889-017-4494-2</a>                                                                                                                                                                                                                                              | Bangladesh                                             | Fragile (LMIC)          | Policy analysis       |
| 59 | NCD                    | Elizabeth L. Budd, Anna J. deRuyter, Zhaoxin Wang, Pauline Sung-Chan, Xiangji Ying, Karishma S. Furtado, Tahna Pettman, Rebecca Armstrong, Rodrigo S. Reis, Jianwei Shi, Tabitha Mui, Tahnee Saunders, Leonardo Becker, and Ross C. Brownson. 2018. "A Qualitative Exploration of Contextual Factors that Influence Dissemination and Implementation of Evidence-Based Chronic Disease Prevention Across Four Countries." <i>BMC Health Services Research</i> 18: 233. <a href="https://doi.org/10.1186/s12913-018-3054-5">https://doi.org/10.1186/s12913-018-3054-5</a> | Australia, Brazil, China, the US                       | Non-fragile (HIC + MIC) | Qualitative method    |
| 60 | NCD                    | Oyun Chimeddamba, Anna Peeters, Helen L. Walls, and Catherine Joyce. 2015. "Noncommunicable Disease Prevention and Control in Mongolia: A Policy Analysis." <i>BMC Public Health</i> 15: 660. <a href="https://doi.org/10.1186/s12889-015-2040-7">https://doi.org/10.1186/s12889-015-2040-7</a>                                                                                                                                                                                                                                                                          | Mongolia                                               | Non-fragile (MIC)       | Policy analysis       |

|    |     |                                                                                                                                                                                                                                                                                                                                                                                                                                                                   |                                                              |                                                |                                  |
|----|-----|-------------------------------------------------------------------------------------------------------------------------------------------------------------------------------------------------------------------------------------------------------------------------------------------------------------------------------------------------------------------------------------------------------------------------------------------------------------------|--------------------------------------------------------------|------------------------------------------------|----------------------------------|
| 61 | NCD | Yodi Christiani, Paul Dugdale, Meredith Tavener, and Julie E. Byles. 2016. "The Dynamic of Non-Communicable Disease Control Policy in Indonesia." <i>Australian Health Review</i> 41: 207–213.                                                                                                                                                                                                                                                                    | Indonesia                                                    | Non-fragile (MIC)                              | Policy analysis                  |
| 62 | NCD | Rebecca Dodd, Erica Reeve, Emalie Sparks, Anita George, Paula Vivili, Si Thu Win Tin, Dai Buresova, Jacqui Webster, and Anne-Marie Thow. 2020. "The Politics of Food in the Pacific: Coherence and Tension in Regional Policies on Nutrition, the Food Environment and Non-Communicable Diseases." <i>Public Health Nutrition</i> 23 (1): 168–180. doi:10.1017/S1368980019002118                                                                                  | Twenty-two Pacific island countries and territories          | Fragile (MIC) [not for OECD]                   | Document analysis                |
| 63 | NCD | Beverley M. Essue and Lydia Kapiriri. 2018. "The Unfunded Priorities: An Evaluation of Priority Setting for Noncommunicable Disease Control in Uganda." <i>Global Health</i> 14: 22. <a href="https://doi.org/10.1186/s12992-018-0324-2">https://doi.org/10.1186/s12992-018-0324-2</a>                                                                                                                                                                            | Uganda                                                       | Fragile (LIC)                                  | Mixed method                     |
| 64 | NCD | Karishma S. Furtado, et al. 2018. "Exploring Political Influences on Evidence-Based Non-Communicable Disease Prevention Across Four Countries." <i>Health Education Research</i> 33 (2): 89–103. <a href="https://doi.org/10.1093/her/cyy005">https://doi.org/10.1093/her/cyy005</a>                                                                                                                                                                              | Australia, Brazil, China and the United States               | Non-fragile (HIC + MIC)                        | Qualitative method               |
| 65 | NCD | Whitney R. et al, 2018. "Implementation of Policy, Systems, and Environmental Community-Based Interventions for Cardiovascular Health Through a National Not-for-Profit: A Multiple Case Study." <i>Health Education and Behavior</i> 45 (6): 855-864. doi:10.1177/1090198118770489                                                                                                                                                                               | USA                                                          | Non-fragile (HIC)                              | Case study                       |
| 66 | NCD | Anne C. Grunseit, Samantha Rowbotham, Melanie Crane, Devon Indig, Adrian E. Bauman, and Andrew Wilson. 2019. "Nanny or Canny? Community Perceptions of Government Intervention for Preventive Health." <i>Critical Public Health</i> 29 (3): 274–289. doi: 10.1080/09581596.2018.1468020                                                                                                                                                                          | Australian states (New South Wales, Victoria, Tasmania)      | Non-fragile (HIC)                              | Mixed method                     |
| 67 | NCD | Pamela A. Juma, Shukri F. Mohamed, Beatrice L. Matanje Mwangomba, Catherine Ndinda, Clarisse Mapa-tassou, Mojisola Oluwasanu, Oladimeji Oladepo, Opeyemi Abiona, Misheck J. Nkhata, Jennifer P. Wisdom, and Jean-Claude Mbanya. 2018. "Non-Communicable Disease Prevention Policy Process in Five African Countries Authors." <i>BMC Public Health</i> 18: 961. <a href="https://doi.org/10.1186/s12889-018-5825-7">https://doi.org/10.1186/s12889-018-5825-7</a> | Kenya, South Africa, Cameroon, Nigeria, Malawi               | Fragile (LIC) + Non-fragile (MIC)              | Case study                       |
| 68 | NCD | Vivian Lin, Catherine Jones, Shiyong Wang, and Enis Baris. 2014. Health in All Policies as a Strategic Policy Response to NCDs. Health, Nutrition, and Population (HNP) discussion paper. World Bank, Washington, DC. <a href="https://openknowledge.worldbank.org/handle/10986/20064">https://openknowledge.worldbank.org/handle/10986/20064</a>                                                                                                                 | Global case studies                                          | Global                                         | Document analysis and case study |
| 69 | NCD | WHO Regional Office for Western Pacific. 2012. Regional Meeting on National Multisectoral Plans for NCD Prevention and Control. Manila : WHO Regional Office for the Western Pacific. <a href="http://iris.wpro.who.int/handle/10665.1/12558">http://iris.wpro.who.int/handle/10665.1/12558</a>                                                                                                                                                                   | WPR                                                          | Non-fragile (HIC + MIC)                        | Meeting report                   |
| 70 | NCD | Johan P. MacKenbach and Martin McKee. 2013. "Social-Democratic Government and Health Policy in Europe: A Quantitative Analysis." <i>International Journal of Health Services</i> 43 (3): 389–413. doi:10.2190/HS.43.3.b                                                                                                                                                                                                                                           | Europe                                                       | Non-                                           | Quantitative method              |
| 71 | NCD | Roger S. Magnusson and David Patterson. 2014. "The Role of Law and Governance Reform in the Global Response to Non-Communicable Diseases." <i>Global Health</i> 10: 44. <a href="https://doi.org/10.1186/1744-8603-10-44">https://doi.org/10.1186/1744-8603-10-44</a>                                                                                                                                                                                             | Global                                                       | Global                                         | Document analysis                |
| 72 | NCD | Roger S. Magnusson, Benn McGrady, Lawrence Gostin, David Patterson, and Hala Abou Taleb. 2019. "Legal Capacities Required for Prevention and Control of Noncommunicable Diseases." <i>Bulletin of the World Health Organization</i> 97 (2): 108–117. <a href="http://dx.doi.org/10.2471/BLT.18.213777">http://dx.doi.org/10.2471/BLT.18.213777</a>                                                                                                                | Global (India, Uganda, Colombia, USA, Chile, Mexico, SA, UK) | Global [Fragile (LIC) + Non-fragile (HIC/MIC)] | Document analysis                |
| 73 | NCD | Heather Manson, Terrence Sullivan, Phat Ha, Christine Navarro, and José M. Martín-Moreno. 2013. "Goals Are Not Enough: Building Public Sector Capacity for Chronic Disease Prevention." <i>Public Health Review</i> 35: 11. <a href="https://doi.org/10.1007/BF03391696">https://doi.org/10.1007/BF03391696</a>                                                                                                                                                   | Global                                                       | Global                                         | Case study                       |

|    |     |                                                                                                                                                                                                                                                                                                                                                                                                                                                                                                                                                                                                                                                                                                            |                                                                             |                                |                                  |
|----|-----|------------------------------------------------------------------------------------------------------------------------------------------------------------------------------------------------------------------------------------------------------------------------------------------------------------------------------------------------------------------------------------------------------------------------------------------------------------------------------------------------------------------------------------------------------------------------------------------------------------------------------------------------------------------------------------------------------------|-----------------------------------------------------------------------------|--------------------------------|----------------------------------|
| 74 | NCD | Juma, P; Mohamed S & Kyobutungi C. 2017. Analysis of non-communicable disease prevention policies in Kenya. Nairobi: APHRC, <a href="http://hdl.handle.net/10625/57553">http://hdl.handle.net/10625/57553</a>                                                                                                                                                                                                                                                                                                                                                                                                                                                                                              | Kenya                                                                       | Non-Fragile (LMIC)             | Qualitative method (case study)  |
| 75 | NCD | Shanthi Mendis and Oleg Chestnov. 2013. "Policy Reform to Realize the Commitments of the Political Declaration on Noncommunicable Diseases." <i>British Medical Bulletin</i> 105 (1): 7–27. <a href="https://doi.org/10.1093/bmb/ldt001">https://doi.org/10.1093/bmb/ldt001</a>                                                                                                                                                                                                                                                                                                                                                                                                                            | Global                                                                      | Global                         | Mixed method                     |
| 76 | NCD | Mulenga M. Mukanu, Joseph Mumba Zulu, Chrispin Mweemba, and Wilbroad Mutale. 2017. "Responding to Non-Communicable Diseases in Zambia: A Policy Analysis." <i>Health Research Policy and Systems</i> 15: 34. <a href="https://doi.org/10.1186/s12961-017-0195-7">https://doi.org/10.1186/s12961-017-0195-7</a>                                                                                                                                                                                                                                                                                                                                                                                             | Zambia                                                                      | Fragile (LMIC)                 | Case study                       |
| 77 | NCD | Catherine Ndinda, Tidings P. Ndhlovu, Pamela Juma, Gershim Asiki, and Catherine Kyobutungi. 2018. "The Evolution of Non-Communicable Diseases Policies in Post-Apartheid South Africa." <i>BMC Public Health</i> 18: 956. <a href="https://doi.org/10.1186/s12889-018-5832-8">https://doi.org/10.1186/s12889-018-5832-8</a>                                                                                                                                                                                                                                                                                                                                                                                | South Africa                                                                | Non-fragile (MIC)              | Document analysis                |
| 78 | NCD | Suladda Pongutta, Rapeepong Suphanchaimat, Walaiporn Patcharanarumol, and Viroj Tangcharoensathien. 2019. "Lessons from the Thai Health Promotion Foundation." <i>Bulletin of the World Health Organization</i> 97 (3): 213–220. <a href="https://doi.org/10.2471/BLT.18.220277">https://doi.org/10.2471/BLT.18.220277</a>                                                                                                                                                                                                                                                                                                                                                                                 | Thailand                                                                    | Non-fragile (MIC)              | Document analysis                |
| 79 | NCD | Linda Richter-Sundberg, Therese Kardakis, Lars Weinehall, Rickard Garvare, and Monica E Nyström. 2015. "Addressing Implementation Challenges During Guideline Development—A Case Study of Swedish National Guidelines for Methods of Preventing Disease." <i>BMC Health Services Research</i> 15: 19. <a href="https://doi.org/10.1186/s12913-014-0672-4">https://doi.org/10.1186/s12913-014-0672-4</a>                                                                                                                                                                                                                                                                                                    | Sweden                                                                      | Non-fragile (HIC)              | Qualitative method (case study)  |
| 80 | NCD | Jianwei Shi, Leiyu Shi, Jinsong Geng, Rui Liu, Xin Gong, Xiaojie Bo, Ning Chen, Qian Liu, Yan Yang, and Zhaoxin Wang. 2019. "Status of Evidence-Based Chronic Diseases Prevention Implementation in Shanghai, China: A Qualitative Study." <i>International Journal of Health Planning and Management</i> 34 (3): 912–925. <a href="https://doi.org/10.1002/hpm.2863">https://doi.org/10.1002/hpm.2863</a>                                                                                                                                                                                                                                                                                                 | China                                                                       | Non-fragile (UMIC)             | Qualitative method               |
| 81 | NCD | Gyambo Sithey, Mu Li, and Anne Marie Thow. 2018. "Strengthening Non-Communicable Disease Policy with Lessons from Bhutan: Linking Gross National Happiness and Health Policy Action." <i>Journal of Public Health Policy</i> 39: 327–342. <a href="https://doi.org/10.1057/s41271-018-0135-y">https://doi.org/10.1057/s41271-018-0135-y</a>                                                                                                                                                                                                                                                                                                                                                                | Bhutan                                                                      | Non-fragile (LMIC)             | Document analysis and interviews |
| 82 | NCD | Titiporn Tuangratananon, Sangay Wangmo, Nimali Widanapathirana, Suladda Pongutta, Shaheda Viriyathorn, Walaiporn Patcharanarumol, Koulund Thin, Somil Nagpal, Christian Edward L. Nuevo, Retna Siwi Padmawati, Maria Elizabeth Puyat-Murga, Laksono Trisnantoro, Kinzang Wangmo, Nalinda Wellappuli, Phuong Hoang Thi, Tuan Khuong Anh, Thinley Zangmo, and Viroj Tangcharoensathien. 2019. "Implementation of National Action Plans on Noncommunicable Diseases, Bhutan, Cambodia, Indonesia, Philippines, Sri Lanka, Thailand and Viet Nam." <i>Bulletin of the World Health Organization</i> 97 (2): 129–141. <a href="https://doi.org/10.2471/BLT.18.220483">https://doi.org/10.2471/BLT.18.220483</a> | Bhutan, Cambodia, Indonesia, Philippines, Sri Lanka, Thailand and Viet Nam. | Non-fragile (MIC)              | Document analysis and interviews |
| 83 | NCD | Nigel Unwin, T. Alafia Samuels, Trevor Hassell, Ross C. Brownson, and Cornelia Guell. 2017. "The Development of Public Policies to Address Non-Communicable Diseases in the Caribbean Country of Barbados: The Importance of Problem Framing and Policy Entrepreneurs." <i>International Journal of Health Policy and Management</i> 6 (2): 71–82. <a href="https://doi.org/10.15171/ijhpm.2016.74">https://doi.org/10.15171/ijhpm.2016.74</a>                                                                                                                                                                                                                                                             | Barbados                                                                    | Non-fragile (HIC)              | Mixed method                     |
| 84 | NCD | Baktygul Akkazieva, Juan Tello, Barton Smith, Melitta Jakab, Konstantin Krasovsky, Nina Sautenkova, Lola Yuldasheva, and Mekhre Shoismatyuloeva. 2015. <i>Better Non-Communicable Disease Outcomes: Challenges and Opportunities for Health Systems. Tajikistan Country Assessment. Regional Office for Europe, World Health Organization, Copenhagen.</i> <a href="https://apps.who.int/iris/handle/10665/153907">https://apps.who.int/iris/handle/10665/153907</a>                                                                                                                                                                                                                                       | Tajikistan                                                                  | Non-fragile (LIC)              | Case study                       |
| 85 | NCD | Yong Ho Khang. 2013. "Burden of Noncommunicable Diseases and National Strategies to Control Them in Korea." <i>Journal of Preventive Medicine and Public Health</i> 46 (4): 155–164. <a href="https://doi.org/10.3961/jpmph.2013.46.4.155">https://doi.org/10.3961/jpmph.2013.46.4.155</a>                                                                                                                                                                                                                                                                                                                                                                                                                 | South Korea                                                                 | Non-fragile (LIC)              | Case study                       |
| 86 | NCD | Regional Office for the Western Pacific. 2017. <i>Progress on the Prevention and Control of Noncommunicable Diseases in the Western Pacific Region: Country Capacity Survey. Regional Office for the Western Pacific, World Health Organization, Manila.</i> <a href="http://iris.wpro.who.int/handle/10665.1/14162">http://iris.wpro.who.int/handle/10665.1/14162</a>                                                                                                                                                                                                                                                                                                                                     | WPR                                                                         | Fragile+ Non-fragile (HIC+MIC) | Survey                           |

|    |                         |                                                                                                                                                                                                                                                                                                                                                                                                                                                                                                                                                                                                                                                                            |                                                                          |                         |                                  |
|----|-------------------------|----------------------------------------------------------------------------------------------------------------------------------------------------------------------------------------------------------------------------------------------------------------------------------------------------------------------------------------------------------------------------------------------------------------------------------------------------------------------------------------------------------------------------------------------------------------------------------------------------------------------------------------------------------------------------|--------------------------------------------------------------------------|-------------------------|----------------------------------|
| 87 | NCD, medicines          | Jordan D. Jarvis, Hannah Woods , Anjli Bali , Efosa Oronsaye, and Nav Persaud. 2019. "Selection of WHO-Recommended Essential Medicines for Non-Communicable Diseases on National Essential Medicines Lists." <i>PLoS ONE</i> 14 (8): e0220781. <a href="https://doi.org/10.1371/journal.pone.0220781">https://doi.org/10.1371/journal.pone.0220781</a>                                                                                                                                                                                                                                                                                                                     | China                                                                    | Non-fragile (UMIC)      | Qualitative method               |
| 88 | Obesity                 | Lucy C. Farrell, Vivienne M. Moore, Megan J. Warin, and Jackie M. Street. 2019. "Why Do the Public Support or Oppose Obesity Prevention Regulations? Results from a South Australian Population Survey." <i>Health Promotion Journal of Australia</i> 30 (1): 47–59. <a href="https://doi.org/10.1002/hpja.185">https://doi.org/10.1002/hpja.185</a>                                                                                                                                                                                                                                                                                                                       | Bhutan                                                                   | Non-fragile (LMIC)      | Document analysis and interviews |
| 89 | Diet                    | Mohammad Amerzadeh and Amirhossein Takian. 2020. "Reducing Sugar, Fat, and Salt for Prevention and Control of Noncommunicable Diseases (NCDs) as an Adopted Health Policy in Iran." <i>Medical Journal of the Islamic Republic of Iran</i> 34: 136. <a href="https://doi.org/10.34171/mjiri.34.136">https://doi.org/10.34171/mjiri.34.136</a>                                                                                                                                                                                                                                                                                                                              | Iran                                                                     | Fragile (UMIC)          | Mixed method                     |
| 90 | Physical activity       | Rodney S. Lyn, Erica R. Sheldon, and Michael P. Eriksen. 2017. "Adopting State-Level Policy to Support Physical Activity Among School-Aged Children and Adolescents: Georgia's SHAPE Act." <i>Public Health Reports</i> 132 (2_suppl): 9S–15S. doi:10.1177/0033354917719705                                                                                                                                                                                                                                                                                                                                                                                                | Australia                                                                | Non-fragile (HIC)       | Survey                           |
| 91 | Physical activity       | Madhuvanti M. Murphy, Nigel Unwin, T. Alafia Samuels, Trevor A Hassell, Lisa Bishop, and Cornelia Guell. 2018. "Evaluating Policy Responses to Noncommunicable Diseases in Seven Caribbean Countries: Challenges to Addressing Unhealthy Diets and Physical Inactivity." <i>Pan American Journal of Public Health</i> 42: e174. <a href="https://doi.org/10.26633/RPSP.2018.174">https://doi.org/10.26633/RPSP.2018.174</a>                                                                                                                                                                                                                                                | Caribbean region                                                         | Non-fragile (HIC + MIC) | Qualitative method               |
| 92 | Physical activity       | Christopher E. Politis, David L. Mowat, and Deb Keen. 2017. "Pathways to Policy: Lessons Learned in Multisectoral Collaboration for Physical Activity and Built Environment Policy Development from the Coalitions Linking Action and Science for Prevention (CLASP) Initiative." <i>Canadian Journal of Public Health</i> 108 (2): e192–e198. <a href="https://doi.org/10.17269/cjph.108.5758">https://doi.org/10.17269/cjph.108.5758</a>                                                                                                                                                                                                                                 | Canada                                                                   | Non-fragile (HIC)       | Qualitative method               |
| 93 | Physical activity       | Katie A. Weatherson, Rhyann McKay, Heather L. Gainforth, and Mary E. Jung. 2017. "Barriers and Facilitators to the Implementation of a School-Based Physical Activity Policy in Canada: Application of the Theoretical Domains Framework." <i>BMC Public Health</i> 17: 83. <a href="https://doi.org/10.1186/s12889-017-4846-y">https://doi.org/10.1186/s12889-017-4846-y</a>                                                                                                                                                                                                                                                                                              | Canada                                                                   | Non-fragile (HIC)       | Qualitative method               |
| 94 | Physical activity, diet | Saskia Muellmann, Berit Steenbock, Katrien De Cocker, Marieke De Craemer, Catherine Hayes, Miriam P. O'Shea, Karolina Horodyska, Justyna Bell, Aleksandra Luszczynska, Gun Roos, Lars Jørn Langøien, Gro Rugseth, Laura Terragni, Ilse De Bourdeaudhuij, Johannes Brug, and Claudia R. Pischke. 2017. "Views of Policy Makers and Health Promotion Professionals on Factors Facilitating Implementation and Maintenance of Interventions and Policies Promoting Physical Activity and Healthy Eating: Results of the DEDIPAC Project." <i>BMC Public Health</i> 17: 932. <a href="https://doi.org/10.1186/s12889-017-4929-9">https://doi.org/10.1186/s12889-017-4929-9</a> | Europe                                                                   | Non-fragile (HIC)       | Mixed method                     |
| 95 | Physical activity, diet | Mojisola Oluwasanu, Opeyemi Oladunni, amd Oladimeji Oladepo. 2020. "Multisectoral Approach and WHO 'Bestbuys' in Nigeria's Nutrition and Physical Activity Policies." <i>Health Promotion International</i> 35 (6): 1383–1393. <a href="https://doi.org/10.1093/heapro/daaa009">https://doi.org/10.1093/heapro/daaa009</a>                                                                                                                                                                                                                                                                                                                                                 | Nigeria                                                                  | Fragile (LMIC)          | Case study                       |
| 96 | Physical activity       | Fiona Bull, Karen Milton, Sonja Kahlmeier, Alberto Arlotti, Andrea Backović Juričan, Olov Belander, Brian Martin, Eva Martin-Diener, Ana Marques, Jorge Mota, Tommi Vasankari, and Anita Vlasveld. 2015. "Turning the Tide: National Policy Approaches to Increasing Physical Activity in Seven European Countries." <i>British Journal of Sports Medicine</i> 49: 749–56.                                                                                                                                                                                                                                                                                                 | Finland, Italy, the Netherlands, Norway, Portugal, Slovenia, Switzerland | Non-fragile (HIC)       | Policy analysis                  |
| 97 | Salt                    | Adriana Blanco-Metzler, et al 2012. "Avances en la reducción del consumo de sal y sodio en Costa Rica [Advances in Reducing Salt and Sodium Intake in Costa Rica]. <i>Revista Panamericana de Salud Publica</i> 32 (4): 316–320. <a href="https://doi.org/10.1590/s1020-49892012001000011">https://doi.org/10.1590/s1020-49892012001000011</a>                                                                                                                                                                                                                                                                                                                             | Costa Rica                                                               | Non-fragile (UMIC)      | Document analysis                |



|     |       |                                                                                                                                                                                                                                                                                                                                                                                                                                                                            |                                    |                         |                                |
|-----|-------|----------------------------------------------------------------------------------------------------------------------------------------------------------------------------------------------------------------------------------------------------------------------------------------------------------------------------------------------------------------------------------------------------------------------------------------------------------------------------|------------------------------------|-------------------------|--------------------------------|
| 98  | Salt  | Norm Campbell, Barbara Legowski, Branka Legetic, Daniel Ferrante, Eduardo Nilson, Christine Campbell, and Mary L'Abbé. 2014. "Targets and Timelines for Reducing Salt in Processed Food in the Americas." <i>Journal of Clinical Hypertension</i> 16 (9): 619–623. <a href="https://doi.org/10.1111/jch.12379">https://doi.org/10.1111/jch.12379</a>                                                                                                                       | 8 countries in the Americas region | Non-fragile (HIC + MIC) | Policy analysis                |
| 99  | Salt  | Luciana Castronuovo, et al. 2017. "Analysis of a Voluntary Initiative to Reduce Sodium in Processed and Ultra-Processed Food Products in Argentina: The Views of Public and Private Sector Representatives." <i>Cadernos de Saude Publica</i> 33 (6): e00014316. <a href="https://doi.org/10.1590/0102-311X00014316">https://doi.org/10.1590/0102-311X00014316</a>                                                                                                         | Argentina                          | Non-fragile (UMIC)      | Qualitative method             |
| 100 | Salt  | Priti Gupta, Sailesh Mohan, Claire Johnson, Vandana Garg, Sudhir Raj Thout, Roopa Shivashankar, Anand Krishnan, Bruce Neal, and Dorairaj Prabhakaran. 2018. "Stakeholders' Perceptions Regarding a Salt Reduction Strategy for India: Findings from Qualitative Research." <i>PLoS ONE</i> 13 (8): e0201707. <a href="https://doi.org/10.1371/journal.pone.0201707">https://doi.org/10.1371/journal.pone.0201707</a>                                                       | India                              | Non-fragile (MIC)       | Qualitative method             |
| 101 | Salt  | F. He, H. Brinsden, and G. MacGregor. 2014. "Salt Reduction in the United Kingdom: A Successful Experiment in Public Health." <i>Journal of Human Hypertension</i> 28: 345–352. <a href="https://doi.org/10.1038/jhh.2013.105">https://doi.org/10.1038/jhh.2013.105</a>                                                                                                                                                                                                    | UK                                 | Non-fragile (HIC)       | Policy analysis                |
| 102 | Salt  | Branka Legetic and Norm Campbell. 2011. "Reducing Salt Intake in the Americas: Pan American Health Organization Actions." <i>Journal of Health Communication</i> 16 Suppl 2: 37–48. <a href="https://doi.org/10.1080/10810730.2011.601227">https://doi.org/10.1080/10810730.2011.601227</a>                                                                                                                                                                                | America region                     | Non-fragile (HIC+MIC)   | Case study                     |
| 103 | Salt  | Shahram Rafieifar, Hamed Pouraram, Abolghassem Djazayeri, Fereydoun Siassi, Zahra Abdollahi, Ahmad Reza Dorosty, Mitra Abtahi, Hossein Kazemeini, and Farshad Farzadfar. 2016. "Strategies and Opportunities Ahead to Reduce Salt Intake." <i>Archives of Iranian Medicine</i> 19 (10): 729–734.                                                                                                                                                                           | Iran                               | Fragile (UMIC)          | Document analysis              |
| 104 | Salt  | Belinda Reeve and Roger Magnusson. 2015. "Food Reformulation and the (Neo)-Liberal State: New Strategies for Strengthening Voluntary Salt Reduction Programs in the UK and USA." <i>Public Health</i> 129 (8): 1061–1073                                                                                                                                                                                                                                                   | UK, USA                            | Non-fragile (HIC)       | Document analysis              |
| 105 | Salt  | Kathy Trieu, Jacqui Webster, Stephen Jan, Silvia Hope, Take Naseri, Merina Jeremia, Colin Bell, Wendy Snowdon, and Marj Moodie. 2018. "Process Evaluation of Samoa's National Salt Reduction Strategy (MASIMA): What Interventions Can Be Successfully Replicated in Lower-Income Countries?" <i>Implementation Science</i> 13: 107. <a href="https://doi.org/10.1186/s13012-018-0802-1">https://doi.org/10.1186/s13012-018-0802-1</a>                                     | Samoa                              | Non-fragile (UMIC)      | Process evaluation and surveys |
| 106 | Diet  | Amos Laar, Amy Barnes, Richmond Aryeetey, Akua Tandoh, Kristin Bash, Kobby Mensah, Francis Zotor, Stefanie Vandevijvere, and Michelle Holdsworth. 2020. "Implementation of Healthy Food Environment Policies to Prevent Nutrition-Related Non-Communicable Diseases in Ghana: National Experts' Assessment of Government Action." <i>Food Policy</i> 93, 101907. <a href="https://doi.org/10.1016/j.foodpol.2020.101907">https://doi.org/10.1016/j.foodpol.2020.101907</a> | Ghana                              | Non-fragile (LMIC)      | Policy analysis                |
| 107 | Salt  | Karen Charlton, Jacqui Webster, and Paul Kowal. 2014. "To Legislate or Not to Legislate? A Comparison of the UK and South African Approaches to the Development and Implementation of Salt Reduction Programs." <i>Nutrients</i> 6 (9): 3672–3695. <a href="https://doi.org/10.3390/nu6093672">https://doi.org/10.3390/nu6093672</a>                                                                                                                                       | UK and South Africa                | Non-fragile (HIC + MIC) | Case study                     |
| 108 | Sugar | Carlos M. Guerrero-López, Mishel Unar-Munguía, and M. Arantxa Colchero. 2017. "Price Elasticity of the Demand for Soft Drinks, Other Sugar-Sweetened Beverages and Energy Dense Food in Chile." <i>BMC Public Health</i> 17: 180. <a href="https://doi.org/10.1186/s12889-017-4098-x">https://doi.org/10.1186/s12889-017-4098-x</a>                                                                                                                                        | Mexico                             | Non-fragile (UMIC)      | Quantitative method            |
| 109 | Sugar | Susan Greenhalgh. 2019. "Soda Industry Influence on Obesity Science and Policy in China." <i>Journal of Public Health Policy</i> 40: 5–16. <a href="https://doi.org/10.1057/s41271-018-00158-x">https://doi.org/10.1057/s41271-018-00158-x</a>                                                                                                                                                                                                                             | China                              | Non-fragile (UMIC)      | Qualitative method             |
| 110 | Sugar | Alex Myers, David Fig, Aviva Tugendhaft, Jonathan E. Myers, and Karen J. Hofman. 2017. "The History of the South African Sugar Industry Illuminates Deeply Rooted Obstacles for Sugar Reduction Anti-Obesity Interventions." <i>African Studies</i> 76 (4): 475–490. doi: 10.1080/00020184.2017.1311515                                                                                                                                                                    | South Africa                       | Non-fragile (UMIC)      | Case study                     |
| 111 | Sugar | Frances Onagan, Beverly Ho, and Karl Kendrick Chua. 2019. "Development of a Sweetened Beverage Tax, Philippines." <i>Bulletin of the World Health Organization</i> 97 (2): 154–159. <a href="https://doi.org/10.2471/BLT.18.220459">https://doi.org/10.2471/BLT.18.220459</a>                                                                                                                                                                                              | Philippines                        | Non-fragile (UMIC)      | Document analysis              |

|     |         |                                                                                                                                                                                                                                                                                                                                                                                                                                                        |                               |                         |                    |
|-----|---------|--------------------------------------------------------------------------------------------------------------------------------------------------------------------------------------------------------------------------------------------------------------------------------------------------------------------------------------------------------------------------------------------------------------------------------------------------------|-------------------------------|-------------------------|--------------------|
| 112 | Sugar   | Vicente Ortún, Beatriz G López-Valcárcel, and Jaime Pinilla. 2016. "Tax on Sugar Sweetened Beverages in Spain." <i>Revista Española de Salud Pública</i> 13 (90) :e1-e13.                                                                                                                                                                                                                                                                              | Multi-country (Spain, Mexico) | Non-fragile (HIC + MIC) | Document analysis  |
| 113 | Sugar   | Christina A. Roberto and Jennifer L. Pomeranz. 2015. "Public Health and Legal Arguments in Favor of a Policy to Cap the Portion Sizes of Sugar-Sweetened Beverages." <i>American Journal of Public Health</i> 105 (11): 2183–2190. <a href="https://doi.org/10.2105/AJPH.2015.302862">https://doi.org/10.2105/AJPH.2015.302862</a>                                                                                                                     | New York, US                  | Non-fragile (HIC)       | Document analysis  |
| 114 | Sugar   | Alex Myers, David Fig, Aviva Tugendhaft, Jessie Mandle, Jonathan Myers, and Karen Hofman. 2017. "Sugar and Health in South Africa: Potential Challenges to Leveraging Policy Change." <i>Global Public Health</i> 12 (1): 98–115. doi: 10.1080/17441692.2015.1071419                                                                                                                                                                                   | South Africa                  | Non-fragile (UMIC)      | Case study         |
| 115 | Tobacco | Naowarut Charoenca, Jeremiah Mock, Nipapun Kungskulniti, Sunida Preechawong, Nicholas Kojetin, and Stephen L. Hamann. 2012. "Success Counteracting Tobacco Company Interference in Thailand: An Example of FCTC Implementation for Low- and Middle-income Countries." <i>International Journal of Environmental Research and Public Health</i> 9: 1111–1134. <a href="https://doi.org/10.3390/ijerph9041111">https://doi.org/10.3390/ijerph9041111</a> | Thailand                      | Non-fragile (MIC)       | Qualitative method |
| 116 | Tobacco | Jeff Collin, Sarah E. Hill, Mor Kandlik Eltanani, Evgeniya Plotnikova, Rob Ralston, and Katherine E. Smith. 2017. "Can Public Health Reconcile Profits and Pandemics? An Analysis of Attitudes to Commercial Sector Engagement in Health Policy and Research." <i>PLoS ONE</i> 12 (9): e0182612. <a href="https://doi.org/10.1371/journal.pone.0182612">https://doi.org/10.1371/journal.pone.0182612</a>                                               | 40 countries (HIC and LMIC)   | Global                  | Survey             |
| 117 | Tobacco | Eric Crosbie, George Thomson, Becky Freeman, and Stella Bialous. 2018. "Advancing Progressive Health Policy to Reduce NCDs Amidst International Commercial Opposition: Tobacco Standardised Packaging in Australia." <i>Global Public Health</i> 13 (12): 1753–1766. doi: 10.1080/17441692.2018.1443485                                                                                                                                                | Australia                     | Non-fragile (HIC)       | Mixed method       |
| 118 | Tobacco | Vera Luiza da Costa e Silva, Daniela Pantani, Mônica Andreis, Robert Sparks, and Ilana Pinsky. 2013. "Bridging the Gap Between Science and Public Health: Taking Advantage of Tobacco Control Experience in Brazil to Inform Policies to Counter Risk Factors for Non-Communicable Diseases." <i>Addiction</i> 108 (8): 1360–1366. <a href="https://doi.org/10.1111/add.12203">https://doi.org/10.1111/add.12203</a>                                   | Brazil                        | Non-fragile (UMIC)      | Case study         |
| 119 | Tobacco | Amanda Fallin, Amie Goodin, Mary Kay Rayens, Sarah Morris, and Ellen J. Hahn. 2014. "Smoke-Free Policy Implementation: Theoretical and Practical Considerations." <i>Policy, Politics, and Nursing Practice</i> 15 (3-4): 81–92. doi:10.1177/1527154414562301                                                                                                                                                                                          | USA                           | Non fragile (HIC)       | Document analysis  |
| 120 | Tobacco | Soumita Ghose, Alok Sardar, Suman Shiva, Brega Ellen Mullan, and Soumitra S Datta. 2019. "Perception of Tobacco Use in Young Adults in Urban India: A Qualitative Exploration with Relevant Health Policy Analysis." <i>Ecancermedicalscience</i> 13: 915. <a href="https://doi.org/10.3332/ecancer.2019.915">https://doi.org/10.3332/ecancer.2019.915</a>                                                                                             | India                         | Non-fragile (LMIC)      | Qualitative method |
| 121 | Tobacco | Holly Jarman. 2013. "Attack on Australia: Tobacco Industry Challenges to Plain Packaging." <i>Journal of Public Health Policy</i> 34: 375–387. <a href="https://doi.org/10.1057/jphp.2013.18">https://doi.org/10.1057/jphp.2013.18</a>                                                                                                                                                                                                                 | Australia                     | Non-fragile (HIC)       | Document analysis  |
| 122 | Tobacco | Ronald Labonté, Raphael Lencucha, Fastone Goma, Richard Zulu, and Jeffrey Drope. 2019. "Consequences of Policy Incoherence: How Zambia's Post-FCTC Investment Policy Stimulated Tobacco Production." <i>Journal of Public Health Policy</i> 40 (3): 286–291. <a href="https://doi.org/10.1057/s41271-019-00171-8">https://doi.org/10.1057/s41271-019-00171-8</a>                                                                                       | Zambia                        | Fragile (LMIC)          | Qualitative method |
| 123 | Tobacco | Jennifer Leeman, Allison Myers, Jennifer C. Grant, Mary Wangen, and Tara L. Queen. 2017. "Implementation Strategies to Promote Community-Engaged Efforts to Counter Tobacco Marketing at the Point of Sale." <i>Translational Behavioral Medicine</i> 7 (3): 405–414. <a href="https://doi.org/10.1007/s13142-017-0489-x">https://doi.org/10.1007/s13142-017-0489-x</a>                                                                                | USA                           | Non-fragile (HIC)       | Qualitative method |
| 124 | Tobacco | Raphael Lencucha, Jeffrey Drope, and Jenina Joy Chavez. 2015. "Whole-of-Government Approaches to NCDs: The Case of the Philippines Interagency Committee-Tobacco." <i>Health Policy and Planning</i> 30 (7): 844–852. <a href="https://doi.org/10.1093/heapol/czu085">https://doi.org/10.1093/heapol/czu085</a>                                                                                                                                        | Philippines                   | Non-fragile (MIC)       | Mixed method       |

|     |         |                                                                                                                                                                                                                                                                                                                                                                                                                                                                                                                             |                                   |                                       |                    |
|-----|---------|-----------------------------------------------------------------------------------------------------------------------------------------------------------------------------------------------------------------------------------------------------------------------------------------------------------------------------------------------------------------------------------------------------------------------------------------------------------------------------------------------------------------------------|-----------------------------------|---------------------------------------|--------------------|
| 125 | Tobacco | Clarisse Mapa-Tassou, Cecile R n e Bonono, Felix Assah, Jennifer Wisdom, Pamela A. Juma, Jean-Claude Katte, Zakariaou Njoumemi, Pierre Ongolo-Zogo, Leopold K. Fezeu, Eugene Sobngwi, and Jean Claude Mbanya. 2018. "Two Decades of Tobacco Use Prevention and Control Policies in Cameroon: Results from the Analysis of Non-Communicable Disease Prevention Policies in Africa." <i>BMC Public Health</i> 18: 958 2018. <a href="https://doi.org/10.1186/s12889-018-5828-4">https://doi.org/10.1186/s12889-018-5828-4</a> | Cameroon                          | Fragile (LMIC)                        | Case study         |
| 126 | Tobacco | Lazarous Mbulo, et al on behalf of GATS collaborative group. 2016. "Preventing Tobacco Epidemic in LMICs with Low Tobacco Use—Using Nigeria GATS to review WHO MPOWER Tobacco Indicators and Prevention Strategies." <i>Preventive Medicine</i> 91S: S9–S15. <a href="https://doi.org/10.1016/j.ypmed.2016.04.005">https://doi.org/10.1016/j.ypmed.2016.04.005</a>                                                                                                                                                          | Nigeria                           | Fragile (LMIC)                        | Survey             |
| 127 | Tobacco | Ashleigh Cussen and Judith McCool. 2011. "Tobacco Promotion in the Pacific: The Current State of Tobacco Promotion Bans and Options for Accelerating Progress." <i>Asia Pacific Journal of Public Health</i> 23 (1): 70–78. doi:10.1177/1010539510390925                                                                                                                                                                                                                                                                    | WPR                               | Fragile (MIC) [not for OECD]          | Document analysis  |
| 128 | Tobacco | Judith McCool, et al. 2013. "Supporting Pacific Island Countries to Strengthen Their Resistance to Tobacco Industry Interference in Tobacco Control: A Case Study of Papua New Guinea and Solomon Islands." <i>International Journal of Environmental Research and Public Health</i> 10 (8): 3424–3434. <a href="https://doi.org/10.3390/ijerph10083424">https://doi.org/10.3390/ijerph10083424</a>                                                                                                                         | Papua New Guinea, Solomon Islands | Fragile (MIC)                         | Document analysis  |
| 129 | Tobacco | Shukri F. Mohamed, Pamela Juma, Gershim Asiki, and Catherine Kyobutungi. 2018. "Facilitators and Barriers in the Formulation and Implementation of Tobacco Control Policies in Kenya: A Qualitative Study." <i>BMC Public Health</i> 18: 960. <a href="https://doi.org/10.1186/s12889-018-5830-x">https://doi.org/10.1186/s12889-018-5830-x</a>                                                                                                                                                                             | Kenya                             | Fragile (LMIC)                        | Case study         |
| 130 | Tobacco | Oladimeji Oladepo, Mojisola Oluwasanu, and Opeyemi Abiona. 2018. "Analysis of Tobacco Control Policies in Nigeria: Historical Development and Application of Multi-Sectoral Action." <i>BMC Public Health</i> 18: 959 2018. <a href="https://doi.org/10.1186/s12889-018-5831-9">https://doi.org/10.1186/s12889-018-5831-9</a>                                                                                                                                                                                               | Nigeria                           | Fragile (LMIC)                        | Case study         |
| 131 | Tobacco | Hilal Ozcebe, Toker Erguder, Mehmet Balcilar, Pavel Ursu, Aaron Reeves, David Stuckler, Andrew Snell, Gauden Galea, Bente Mikkelsen, and Kristina Mauer-Stender. 2018. "The Perspectives of Politicians on Tobacco Control in Turkey." <i>European Journal of Public Health</i> 28 (suppl_2): 17–21. <a href="https://doi.org/10.1093/eurpub/cky152">https://doi.org/10.1093/eurpub/cky152</a>                                                                                                                              | Turkey                            | Non-fragile (UMIC)                    | Mixed method       |
| 132 | Tobacco | Jalal Poorolajal, Younes Mohammadi, and Azam Mahmoodi. 2017. "Challenges of Tobacco Control Program in Iran." <i>Archives of Iranian Medicine</i> 20 (4): 229–234.                                                                                                                                                                                                                                                                                                                                                          | Iran                              | Fragile (UMIC)                        | Survey             |
| 133 | Tobacco | Erica Cavalcanti Rangel, et al. 2017. "The Decision-Making Process in Brazil's Ratification of the World Health Organization Framework Convention on Tobacco Control." <i>Cadernos de Saude Publica</i> 33 (Suppl 3): e00126115. <a href="https://doi.org/10.1590/0102-311X00126115">https://doi.org/10.1590/0102-311X00126115</a>                                                                                                                                                                                          | Brasil                            | Non-fragile (UMIC)                    | Qualitative method |
| 134 | Tobacco | Lindsay Robertson, Louise Marsh, Janet Hoek, Rob McGee, and Richard Egan. 2015. "Regulating the Sale of Tobacco in New Zealand: A Qualitative Analysis of Retailers' Views and Implications for Advocacy." <i>International Journal on Drug Policy</i> 26 (12): 1222–1230. <a href="https://doi.org/10.1016/j.drugpo.2015.08.015">https://doi.org/10.1016/j.drugpo.2015.08.015</a>                                                                                                                                          | New Zealand                       | Non-fragile (HIC)                     | Qualitative method |
| 135 | Tobacco | Michal Stoklosa and Hana Ross. 2014. "Tobacco Control Funding for Low-Income and Middle-Income Countries in a Time of Economic Hardship." <i>Tobacco Control</i> 23: e122–e126.                                                                                                                                                                                                                                                                                                                                             | LMICs                             | Global                                | Case study         |
| 136 | Tobacco | Saliyou Sanni, Charles Hongoro, Catherine Ndinda, and Jennifer P. Wisdom. 2018. Assessment of the Multi-Sectoral Approach to Tobacco Control Policies in South Africa and Togo. <i>BMC Public Health</i> 18: 962. <a href="https://doi.org/10.1186/s12889-018-5829-3">https://doi.org/10.1186/s12889-018-5829-3</a>                                                                                                                                                                                                         | South Africa and Togo             | Fragile (LIC) + Non-fragile (HIC/MIC) | Document analysis  |
| 137 | Tobacco | Travis D. Satterlund, Diana Cassady, Jeanette Treiber, and Cathy Lemp. 2011. "Barriers to Adopting and Implementing Local-Level Tobacco Control Policies." <i>Journal of Community Health</i> 36 (4): 616–623. <a href="https://doi.org/10.1007/s10900-010-9350-6">https://doi.org/10.1007/s10900-010-9350-6</a>                                                                                                                                                                                                            | California, USA                   | Non-fragile (HIC)                     | Document analysis  |

|     |                        |                                                                                                                                                                                                                                                                                                                                                                                                                                                                                         |                                                      |                                   |                      |
|-----|------------------------|-----------------------------------------------------------------------------------------------------------------------------------------------------------------------------------------------------------------------------------------------------------------------------------------------------------------------------------------------------------------------------------------------------------------------------------------------------------------------------------------|------------------------------------------------------|-----------------------------------|----------------------|
| 138 | Tobacco                | World Health Organization and WHO Framework Convention on Tobacco Control. 2020. WHO FCTC Implementation Review in Pacific Island Countries. Geneva: World Health Organization. <a href="https://apps.who.int/iris/handle/10665/337194">https://apps.who.int/iris/handle/10665/337194</a> .                                                                                                                                                                                             | Pacific island countries                             | Fragile (MIC) [not for OECD]      | Case study           |
| 139 | Tobacco                | Jennifer P et al 2018. Influence of the WHO Framework Convention on Tobacco Control on Tobacco Legislation and Policies in Sub-Saharan Africa, BMC Public Health 18: 954 2018. <a href="https://doi.org/10.1186/s12889-018-5827-5">https://doi.org/10.1186/s12889-018-5827-5</a>                                                                                                                                                                                                        | Cameroon, Kenya, Nigeria, Malawi, South Africa, Togo | Fragile (LIC) + Non-fragile (MIC) | Case study           |
| 140 | Tobacco                | World Bank Group. 2018. Reducing Tobacco Use Through Taxation: The Experience of the Republic of Korea. World Bank, Washington, DC. <a href="https://openknowledge.worldbank.org/handle/10986/30020">https://openknowledge.worldbank.org/handle/10986/30020</a>                                                                                                                                                                                                                         | Republic of Korea                                    | Non fragile (HIC)                 | Case study           |
| 141 | Tobacco                | World Bank Group. 2018. Advancing Action on the Implementation of Tobacco Tax Harmonization in the Organization of Eastern Caribbean States Countries. World Bank, Washington, DC. <a href="https://openknowledge.worldbank.org/handle/10986/30034">https://openknowledge.worldbank.org/handle/10986/30034</a>                                                                                                                                                                          | Caribbean Island countries                           | Non-fragile (MIC)                 | Case study           |
| 142 | Tobacco                | Robert Beaglehole, Ruth Bonita, Derek Yach, Judith Mackay, and K. Srinath Reddy. 2015. "A Tobacco-Free World: A Call to Action to Phase Out the Sale of Tobacco Products by 2040." <i>Lancet</i> 385 (9972): 1011–1018                                                                                                                                                                                                                                                                  | Global                                               | Global                            | Case study           |
| 143 | Tobacco                | Anna B. Gilmore, Gary Fooks, Jeffrey Drope, Stella Aguinaga Bialous, and Rachel Rose Jackson. 2015. "Exposing and Addressing Tobacco Industry Conduct in Low-Income and Middle-Income Countries." <i>Lancet</i> 385 (9972): 1029–1043.                                                                                                                                                                                                                                                  | LMICs                                                | Non-fragile (LMIC)                | Case study           |
| 144 | Tobacco                | Judith Mackay, Bungon Ritthiphakdee, and K. Srinath Reddy. 2013. "Tobacco Control in Asia." <i>Lancet</i> 381 (9877): 1581–1587.                                                                                                                                                                                                                                                                                                                                                        | SEARO and WPRO                                       | Non-fragile (HIC+MiC)             | Document analysis    |
| 145 | Tobacco                | Gonghuan Yang, Yu Wang, Yiqun Wu, Jie Yang, and Xia Wan. 2015. "The Road to Effective Tobacco Control in China." <i>Lancet</i> 385 (9972): 1019–1028.                                                                                                                                                                                                                                                                                                                                   | China                                                | Non-fragile (UMIC)                | Case study           |
| 146 | Tobacco, food, alcohol | Raphael Lencucha and Anne Marie Thow. 2019. "How Neoliberalism Is Shaping the Supply of Unhealthy Commodities and What This Means for NCD Prevention." <i>International Journal of Health Policy and Management</i> 8 (9): 514–520. <a href="https://doi.org/10.15171/ijhpm.2019.56">https://doi.org/10.15171/ijhpm.2019.56</a>                                                                                                                                                         | Malawi, Zambia, Philippines                          | Fragile + Non-fragile             | Prospective analysis |
| 147 | Trans fatty acids      | <a href="https://doi.org/10.1111/jch.13945">Andrey Demin, et al. 2020. "Trans Fatty Acid Elimination Policy in Member States of the Eurasian Economic Union: Implementation Challenges and Capacity for Enforcement." <i>Journal of Clinical Hypertension</i> 22 (8): 1328–1337. https://doi.org/10.1111/jch.13945</a>                                                                                                                                                                  | Europe                                               | Non fragile (HIC)                 | Case study           |
| 148 | Primary care           | Lwin Lwin Aye, et al 2020. "Experiences from the Pilot Implementation of the Package of Essential Non-Communicable Disease Interventions (PEN) in Myanmar, 2017-18: A Mixed Methods Study." <i>PLoS ONE</i> 15 (2): e0229081. <a href="https://doi.org/10.1371/journal.pone.0229081">https://doi.org/10.1371/journal.pone.0229081</a>                                                                                                                                                   | Myanmar                                              | Fragile (MIC)                     | Mixed method         |
| 149 | CVD                    | Rawlance Ndejjo, Rhoda K. Wanyenze, Fred Nuwaha, Hilde Bastiaens, and Geoffrey Musinguzi. 2020. "Barriers and Facilitators of Implementation of a Community Cardiovascular Disease Prevention Programme in Mukono and Buikwe Districts in Uganda Using the Consolidated Framework for Implementation Research." <i>Implementation Science</i> 15: 106. <a href="https://doi.org/10.1186/s13012-020-01065-0">https://doi.org/10.1186/s13012-020-01065-0</a>                              | Uganda                                               | Fragile (LIC)                     | Qualitative method   |
| 150 | NCD                    | L.O. Gostin, H. Abou-Taleb, S.A. Roache, and A. Alwan. 2017. "Legal Priorities for Prevention of non-Communicable Diseases: Innovations from WHO's Eastern Mediterranean Region." <i>Public Health</i> 144: 4–12. <a href="https://doi.org/10.1016/j.puhe.2016.11.001">https://doi.org/10.1016/j.puhe.2016.11.001</a>                                                                                                                                                                   | EMR                                                  | Fragile + Non-fragile             | Document analysis    |
| 151 | Physical activity      | Bojana Klepac Pogrmilovic, Andrea Ramirez Varela, Michael Pratt, Karen Milton, Adrian Bauman, Stuart J. H. Biddle, and Zeljko Pedisic. 2020. "National Physical Activity and Sedentary Behaviour Policies in 76 Countries: Availability, Comprehensiveness, Implementation, and Effectiveness." <i>International Journal of Behavioral Nutrition and Physical Activity</i> 17: 116. <a href="https://doi.org/10.1186/s12966-020-01022-6">https://doi.org/10.1186/s12966-020-01022-6</a> | Global                                               | Global                            | Case study           |

|     |                   |                                                                                                                                                                                                                                                                                                                                                                                                                                                                                                                                                                |                                 |                              |                    |
|-----|-------------------|----------------------------------------------------------------------------------------------------------------------------------------------------------------------------------------------------------------------------------------------------------------------------------------------------------------------------------------------------------------------------------------------------------------------------------------------------------------------------------------------------------------------------------------------------------------|---------------------------------|------------------------------|--------------------|
| 152 | Primary care      | Luis Orlando Perez. 2013. Uruguay–UY Non Communicable Diseases Prevention Project : P050716–Implementation Status Results Report : Sequence 10 (). Washington, DC: World Bank Group. <a href="http://documents.worldbank.org/curated/en/841071468130210742/Uruguay-UY-Non-Communicable-Diseases-Prevention-Project-P050716-Implementation-Status-Results-Report-Sequence-10">http://documents.worldbank.org/curated/en/841071468130210742/Uruguay-UY-Non-Communicable-Diseases-Prevention-Project-P050716-Implementation-Status-Results-Report-Sequence-10</a> | Uruguay                         | Non-fragile (MIC)            | Case study         |
| 153 | Physical activity | Regional Committee for Africa, 70. 2020. Framework for the Implementation of the Global Action Plan on Physical Activity 2018–2030 in the WHO African Region: Report of the Secretariat. Regional Office for Africa, World Health Organization, Brazzaville, Republic of Congo. <a href="https://apps.who.int/iris/handle/10665/333737">https://apps.who.int/iris/handle/10665/333737</a>                                                                                                                                                                      | African Region                  | Fragile + Non-fragile        | Report             |
| 154 | CVD               | World Health Organization. 2020. Technical Package for Cardiovascular Disease Management in Primary Health Care: Healthy-Lifestyle Counselling. World Health Organization, Geneva. <a href="https://apps.who.int/iris/handle/10665/260422">https://apps.who.int/iris/handle/10665/260422</a> .                                                                                                                                                                                                                                                                 | Global                          | Global                       | Technical paper    |
| 155 | CVD               | World Health Organization. 2020. Improving Hypertension Control in 3 Million People: Country Experiences of Programme Development and Implementation. World Health Organization, Geneva. <a href="https://apps.who.int/iris/handle/10665/336019">https://apps.who.int/iris/handle/10665/336019</a>                                                                                                                                                                                                                                                             | Global                          | Global                       | Mixed method       |
| 156 | CVD               | Nicole Fraser-Hurt, Shuo Zhang, Dayo Carol Obure, Leusa Take Naseri, Robert Thompsen, Victoria Ieremia-Faasili, and Athena Matalavea. 2020. Care for Hypertension and Other Chronic Conditions in Samoa: Understanding the Bottlenecks and Closing the Implementation Gaps. World Bank, Washington, DC. <a href="https://openknowledge.worldbank.org/handle/10986/33256">https://openknowledge.worldbank.org/handle/10986/33256</a>                                                                                                                            | Samoa                           | Fragile (MIC) [not for OECD] | Mixed method       |
| 157 | CVD               | Dylan Collins, Tiina Laatikainen, and Jill Farrington. 2020. “Implementing Essential Interventions for Cardiovascular Disease Risk Management in Primary Healthcare: Lessons from Eastern Europe and Central Asia. <i>BMJ Global Health</i> 5: e002111.                                                                                                                                                                                                                                                                                                        | Eastern Europe and Central Asia | Non-fragile                  | Qualitative method |
